# Supplementary material for: The Molecular Epidemiology of Epizootic Hemorrhagic Disease Viruses Identified in Israel between 2015 and 2023
Source: MDPI journal article supplement (doi:10.3390/epidemiologia5010006), 2024-02-20
Supplement: s1 [file s1]

**Table S1.** List of primers used for partial sequencing of epizootic hemorrhagic disease virus serotype 7 and bluetongue virus serotype 4

| Virus type/segment     | name           | Oligo sequence (5' to 3')       | length of product | source     |
|------------------------|----------------|---------------------------------|-------------------|------------|
| BTV-4,10,11,17,20,24/2 | BT4-10-24-21F  | ATG GAG GAR TTY GTC ATW CCW GT  | 329               | [61]       |
| BTV-4,10,11,17,20,24/2 | BT4-10-24-330R | TCR ATR GCY CAY TTC ATC CA      |                   | [61]       |
| Universal-EHDV/1       | EHD-VP1-3F     | TAA AAT GCA ATG GTC GCA ATY AC  | 442               | this study |
|                        | EHD-VP1-426R   | TRT CTC CRT ATA TYT GCA T       |                   | this study |
| EHDV-7/1               | EHD-S1-1652F   | GG AAA TAC TTC ACC CGA GTA TAA  | 504               | this study |
|                        | EHD-S1-2136R   | AAC GCC AAA TCA CTC CCA TC      |                   | this study |
|                        | EHD-S1-2275F   | TCC TAT CAG AAC AAT ATG TGG G   | 688               | this study |
|                        | EHD-S1-2941R   | GCC ATC TTT GTT TCT GAT CCA A   |                   | this study |
| EHDV-7/2               | EHD7-S2-2F     | TTA AAT TGT TCC CAG GAT G       | 352               | this study |
|                        | EHD7-S2-334R   | TAA TTC TTC GAA CGC ACC CT      |                   | this study |
|                        | EHD7-S2-1585F  | TCC TAA GGT TGC CTC CTT ATT     | 468               | this study |
|                        | EHD7-S2-2031R  | AAT CCG TAT AAT CAC GAG GGT C   |                   | this study |
|                        | EHD7-S2-2300F  | GAT GTA TTT TTA TCA AGC GCT CAT | 703               | this study |
|                        | EHD7-S2-2979R  | GTA AGA CTA TTG ATC CCA GTA GAC |                   | this study |
| EHDV-7/3               | EHD-S3-1F      | GTT AAA TTT CCA GAG CGA TG      | 771               | this study |
|                        | EHD-S3-751R    | ACT CCT GCG AAA AGG TCA TAC     |                   | this study |
|                        | EHD-S3-1145F   | TTT AAT GTT TAC AGC GGG AC      | 1107              | this study |
|                        | EHD-S3-2229R   | TCA TAT GTA TAC TGC ACC ACT CG  |                   | this study |
|                        | EHD-S3-2422F   | CGA GTG AGA AAG GTG GGC TA      | 348               | this study |
|                        | EHD-S3-2748R   | GTA AGT GTA TTA CCC AGT GCC T   |                   | this study |
| EHDV-7/4               | EHD-S4-1F      | GTT AAA ACA TGC CGG AGC C       | 363               | this study |
|                        | EHD-S4-363R    | ATG CGT AGC TAC GTA GGA TGT C   |                   | this study |
|                        | EHD-S4-563F    | TGC CAT CTA TAG CTG TGA AGA     | 1000              | this study |
|                        | EHD-S4-1543R   | GCA TAG CGA TAT GTC AGG AA      |                   | this study |
|                        | EHD-S4-1710F   | TGG TGG TTT AAA ATG ATA TTA GA  | 267               | this study |
|                        | EHD-S4-1956R   | TAG GTG TAA CAT GCA GGC CTT     |                   | this study |
| EHDV-7/8               | EHD-S8-213F    | CGT ATC GCA TTC AGG ATG G       | 735               | this study |
|                        | EHD-S8-926R    | CGA GCA TTG ACA ATC GTT CAT C   |                   | this study |
| Universal-EHDV/9       | EHD-VP6-4F     | AAA AAT TGC GCA TGT CAG C       | 409               | this study |
|                        | EHD-VP6-394R   | CTT CCT CCT CCC GTC CCA T       |                   | this study |
| EHDV-7/9               | EHD-S9-1F      | GTT AAA AAA TTG CGC ATG TCA     | 307               | this study |

|                       |              |                               |     |            |
|-----------------------|--------------|-------------------------------|-----|------------|
|                       | EHD-S9-287R  | GTT CTC CAG ATC GAT TAT CGC   |     | this study |
| Universal-BTV-EHDV/10 | EHD-S10-1F   | GTT AAA AAG AGG TTG GTG CC    | 318 | this study |
| EHDV-7/10             | EHD-S10-297R | TCA ACC ATC ACD CCA TTA TGT T |     | this study |
| Universal-EHDV/10     | BT-EHD-S10R  | ACCCTCCCCCGYTAKACARC          | 787 | [62]       |

**Table S2.** List of sequenced Israeli EHDV strains for the present study

| serotype | year | segment/<br>length<br>strain | 1/3942              | 2/3002              | 3/2768              | 4/1983-1984        | 5/1770              | 6/1641              | 7/1162              | 8/1186              | 9/1074-1140         | 10/810             |
|----------|------|------------------------------|---------------------|---------------------|---------------------|--------------------|---------------------|---------------------|---------------------|---------------------|---------------------|--------------------|
| 6        | 2015 | ISR-4487/15                  | OM502363<br>12-3920 | OM502364<br>17-2932 | OM502365<br>18-2717 | OM502366<br>1-1935 | OM502367<br>33-1682 | OM502368<br>28-1611 | OM502369<br>18-1067 | OM502370<br>20-1141 | OM502371<br>15-1094 | OM502372<br>21-707 |
| 1        | 2016 | ISR-2096/16                  | OM502373<br>12-3920 | OM502374<br>17-2931 | OM502375<br>18-2717 | OM502376<br>9-1943 | OM502377<br>33-1688 | OM502378<br>28-1611 | OM502379<br>18-1067 | OM502380<br>20-1141 | OM502381<br>15-1094 | OM502382<br>21-707 |
| 7        | 2020 | ISR-2262/2/20                | OR602552<br>1-3942  | OR602553<br>2-2995  | OR602554<br>4-2768  | OR602555<br>1-1981 | OR602556<br>13-1766 | OR602557<br>12-1632 | OR602558<br>10-1150 | OR602559<br>10-1185 | OR602560<br>1-1062  | OR602561<br>1-797  |
| 7        | 2020 | ISR-2556/20                  | OR774975<br>2-444   | no                  | no                  | no                 | no                  | no                  | no                  | no                  | OR774976<br>8-390   | OR774977<br>62-701 |
| 7        | 2020 | ISR-2647/20                  | OR774978<br>2-444   | no                  | no                  | no                 | no                  | no                  | no                  | no                  | OR774979<br>3-389   | no                 |
| 7        | 2020 | ISR-2262/3/20                | OR774980<br>24-430  | no                  | no                  | no                 | no                  | no                  | no                  | no                  | OR774981<br>14-389  | OR774982<br>35-691 |
| 8        | 2023 | ISR-1692/2/23                | no                  | OR636216<br>23-698  | no                  | no                 | no                  | no                  | no                  | no                  | no                  | no                 |
| 8        | 2023 | ISR-1692/9/23                | no                  | OR636217<br>23-544  | no                  | no                 | no                  | no                  | no                  | no                  | no                  | no                 |

Upper rows provide accession numbers of sequenced regions. Lower rows show sequences regions.
